# Supplementary material for: scCircle-seq unveils the diversity and complexity of circular DNAs in single cells
Source: Research Square preprint supplement (doi:10.21203/rs.3.rs-2617401/v1), 2023-02-24
Supplement: Supplementary file 1 [file c192749234b9dbefe3fe3bb4.xlsx]

## Sheet: Suppl Table 1
Supplementary Table 1. Summary of sequencing data.
Library_ID	Cell type	Method	Sample	Amplification	Batch	Drug	Paired_RNA	Mapping_Ratio(%)	Genome_Coverage_Percent(%)	Circle_Read_Percent(%)	Circle_Region_Number
P1-1	PC3	whole_cell_no_nick_repair	Single_Cell	MDA	1	NO	NO	98.87	0.755	67.3074	1172
P1-2	PC3	whole_cell_no_nick_repair	Single_Cell	MDA	1	NO	NO	98.05	1.9936	71.9371	2138
P1-3	PC3	whole_cell_no_nick_repair	Single_Cell	MDA	1	NO	NO	96.7	1.0861	68.7429	1146
P1-4	PC3	whole_cell_no_nick_repair	Single_Cell	MDA	1	NO	NO	98.38	1.7239	71.2206	1832
P1-5	PC3	whole_cell_no_nick_repair	Single_Cell	MDA	1	NO	NO	98.23	3.0333	69.9967	3647
P2-1	PC3	whole_cell_no_nick_repair	Single_Cell	MDA	1	NO	NO	98.07	3.7819	69.4473	4034
P2-2	PC3	Nuclei_FFPE_PI	Single_Cell	MDA	1	NO	NO	97.44	2.4953	69.953	2924
P2-3	PC3	Nuclei_FFPE_PI	Single_Cell	MDA	1	NO	NO	97.95	2.7304	67.753	3278
P2-4	PC3	Nuclei_FFPE_PI	Single_Cell	MDA	1	NO	NO	98.53	3.9692	69.5592	4144
P2-5	PC3	Nuclei_FFPE_PI	Single_Cell	MDA	1	NO	NO	98.56	4.0814	68.612	4457
P3-1	PC3	Nuclei_GF_Heat	Single_Cell	MDA	1	NO	NO	98.45	0.709	66.2561	789
P3-2	PC3	Nuclei_GF_Heat	Single_Cell	MDA	1	NO	NO	98.72	0.3785	56.4667	499
P3-3	PC3	Nuclei_GF_Heat	Single_Cell	MDA	1	NO	NO	98.73	0.5817	66.4515	749
P3-4	PC3	Nuclei_GF_Heat	Single_Cell	MDA	1	NO	NO	98.48	0.3192	60.3212	345
P3-5	PC3	Nuclei_GF_Heat	Single_Cell	MDA	1	NO	NO	98.78	0.7522	66.9255	762
P4-1	PC3	Nuclei_GF_PI	Single_Cell	MDA	1	NO	NO	98.56	6.7444	63.4087	5204
P4-2	PC3	Nuclei_GF_PI	Single_Cell	MDA	1	NO	NO	98.08	5.2461	69.3894	3699
P4-3	PC3	Nuclei_GF_PI	Single_Cell	MDA	1	NO	NO	98.92	3.2396	70.7648	3132
P5-1	PC3	Nuclei_optimal	Single_Cell	MDA	1	NO	NO	98.52	1.8373	64.707	2475
P5-2	PC3	Nuclei_optimal	Single_Cell	MDA	1	NO	NO	98.68	2.6639	70.9082	3155
P5-3	PC3	Nuclei_optimal	Single_Cell	MDA	1	NO	NO	97.54	2.4121	69.6401	3103
P5-4	PC3	Nuclei_optimal	Single_Cell	MDA	1	NO	NO	98.59	2.4391	69.5553	2783
P5-5	PC3	Nuclei_optimal	Single_Cell	MDA	1	NO	NO	98.19	3.1549	68.6504	3511
P5-6	PC3	Nuclei_optimal	Single_Cell	MDA	1	NO	NO	97.23	2.4085	66.8605	2948
P6-1	PC3	Nuclei_optimal	Single_Cell	MDA	1	NO	NO	94.76	3.2419	65.3407	3314
P6-2	PC3	Nuclei_optimal	Single_Cell	MDA	1	NO	NO	96.66	4.0918	65.1437	3929
P6-3	PC3	Nuclei_optimal	Single_Cell	MDA	1	NO	NO	96.3	3.5847	66.5252	3833
P6-4	PC3	Nuclei_optimal	Single_Cell	MDA	1	NO	NO	97.04	3.137	69.0693	3279
T-1	293T	Nuclei_optimal	Single_Cell	MDA	1	NO	NO	96.18	1.957	66.0273	2505
T-2	293T	Nuclei_optimal	Single_Cell	MDA	1	NO	NO	98.73	2.2583	69.6065	3044
T-3	293T	Nuclei_optimal	Single_Cell	MDA	1	NO	NO	98.14	1.7077	68.931	2416
P1e	PC3	Nuclei_optimal	Single_Cell	MDA	2	NO	YES	97.59	4.1458	78.5938	4240
P2e	PC3	Nuclei_optimal	Single_Cell	MDA	2	NO	YES	95.86	4.6303	76.55	4162
P3e	PC3	Nuclei_optimal	Single_Cell	MDA	2	NO	YES	97.29	8.2144	75.2658	5339
P4e	PC3	Nuclei_optimal	Single_Cell	MDA	2	NO	NO	41.94	0.2665	0.1349	765
P5e	PC3	Nuclei_optimal	Single_Cell	MDA	2	NO	YES	95.64	7.3515	74.0491	5280
P6e	PC3	Nuclei_optimal	Single_Cell	MDA	2	NO	YES	92.94	4.4486	72.6261	3984
P7e	PC3	Nuclei_optimal	Single_Cell	MDA	2	NO	NO	43.31	0.4155	1.5844	474
P8e	PC3	Nuclei_optimal	Single_Cell	MDA	2	NO	YES	92.23	5.1452	72.2511	4015
P9e	PC3	Nuclei_optimal	Single_Cell	MDA	2	NO	YES	96.94	6.851	76.5253	5665
P10e	PC3	Nuclei_optimal	Single_Cell	MDA	2	NO	YES	97.31	4.9401	78.8959	4458
P11e	PC3	Nuclei_optimal	Single_Cell	MDA	2	NO	YES	95.43	6.3323	74.868	4720
P12e	PC3	Nuclei_optimal	Single_Cell	MDA	2	NO	YES	93.87	5.9318	73.8827	5057
C1e	Colo320DM	Nuclei_optimal	Single_Cell	MDA	2	NO	YES	98.99	5.6787	92.5059	4624
C2e	Colo320DM	Nuclei_optimal	Single_Cell	MDA	2	NO	YES	98.85	5.0929	92.7117	3904
C3e	Colo320DM	Nuclei_optimal	Single_Cell	MDA	2	NO	YES	99	6.7023	92.2405	4904
C4e	Colo320DM	Nuclei_optimal	Single_Cell	MDA	2	NO	YES	98.1	5.6127	90.7037	5125
C5e	Colo320DM	Nuclei_optimal	Single_Cell	MDA	2	NO	YES	98.84	6.547	92.3535	4878
C6e	Colo320DM	Nuclei_optimal	Single_Cell	MDA	2	NO	YES	98.62	4.4879	92.839	3741
C7e	Colo320DM	Nuclei_optimal	Single_Cell	MDA	2	NO	YES	98.88	6.9653	90.5289	5588
C9e	Colo320DM	Nuclei_optimal	Single_Cell	MDA	2	NO	YES	48.35	0.4957	4.995	717
C10e	Colo320DM	Nuclei_optimal	Single_Cell	MDA	2	NO	YES	97.72	3.1658	89.3082	3220
C11e	Colo320DM	Nuclei_optimal	Single_Cell	MDA	2	NO	NO	98.37	3.6961	91.4466	3318
H1e	HeLa	Nuclei_optimal	Single_Cell	MDA	2	NO	YES	98.23	4.5783	78.3338	3765
H2e	HeLa	Nuclei_optimal	Single_Cell	MDA	2	NO	YES	95.49	3.834	74.7671	3600
H3e	HeLa	Nuclei_optimal	Single_Cell	MDA	2	NO	YES	98.65	5.745	79.1118	4646
H4e	HeLa	Nuclei_optimal	Single_Cell	MDA	2	NO	YES	97.67	6.5675	76.3749	4612
H5e	HeLa	Nuclei_optimal	Single_Cell	MDA	2	NO	YES	97.66	4.3051	77.2616	3446
H6e	HeLa	Nuclei_optimal	Single_Cell	MDA	2	NO	YES	97.83	5.5641	77.6007	4661
H7e	HeLa	Nuclei_optimal	Single_Cell	MDA	2	NO	YES	96.4	5.8917	73.9098	5563
H8e	HeLa	Nuclei_optimal	Single_Cell	MDA	2	NO	YES	98.12	6.2119	78.7641	5152
H9e	HeLa	Nuclei_optimal	Single_Cell	MDA	2	NO	YES	98.42	5.2568	79.0638	4310
H10e	HeLa	Nuclei_optimal	Single_Cell	MDA	2	NO	YES	96.91	4.74	77.6016	3825
H11e	HeLa	Nuclei_optimal	Single_Cell	MDA	2	NO	YES	97.96	5.1973	77.3056	4276
H12e	HeLa	Nuclei_optimal	Single_Cell	MDA	2	NO	YES	97.85	3.9752	77.0122	3470
H13e	HeLa	Nuclei_optimal	Single_Cell	MDA	2	NO	YES	94.57	4.3478	73.244	3672
H14e	HeLa	Nuclei_optimal	Single_Cell	MDA	2	NO	YES	97.94	5.5979	78.4179	4605
H15e	HeLa	Nuclei_optimal	Single_Cell	MDA	2	NO	YES	96.9	4.3514	75.9417	3648
H16e	HeLa	Nuclei_optimal	Single_Cell	MDA	2	NO	YES	96.6	4.4159	76.0855	3940
H17e	HeLa	Nuclei_optimal	Single_Cell	MDA	2	NO	YES	98.38	4.6119	79.1806	3937
H18e	HeLa	Nuclei_optimal	Single_Cell	MDA	2	NO	YES	98.13	4.2801	79.707	3405
H19e	HeLa	Nuclei_optimal	Single_Cell	MDA	2	NO	YES	97.94	6.0222	77.7473	4751
H20e	HeLa	Nuclei_optimal	Single_Cell	MDA	2	NO	YES	96.9	6.4238	76.7432	5013
H21e	HeLa	Nuclei_optimal	Single_Cell	MDA	2	NO	YES	97.9	4.2414	78.9479	3702
H22e	HeLa	Nuclei_optimal	Single_Cell	MDA	2	NO	YES	96.18	4.5023	76.5544	3711
H23e	HeLa	Nuclei_optimal	Single_Cell	MDA	2	NO	YES	95.82	3.7759	75.5034	3397
H24e	HeLa	Nuclei_optimal	Single_Cell	MDA	2	NO	YES	93.44	3.6441	69.9126	4086
pc3_bulk_ecDNA	PC3	Bulk	Circle-seq	Bulk	Sample	No_Amplification	2	NO	NO	99.71	14.2863	39.4723	6195
batch4_C1e	Colo320DM	Nuclei_optimal	Single_Cell	MDA	4	NO	NO	55.5	0.1827	27.3304	1486
batch4_C2e	Colo320DM	Nuclei_optimal	Single_Cell	MDA	4	NO	YES	98.29	12.5984	77.4252	5622
batch4_C3e	Colo320DM	Nuclei_optimal	Single_Cell	MDA	4	NO	YES	97.73	4.9694	76.5858	4224
batch4_C4e	Colo320DM	Nuclei_optimal	Single_Cell	MDA	4	NO	YES	96.36	10.2826	75.1989	5521
batch4_C5e	Colo320DM	Nuclei_optimal	Single_Cell	MDA	4	NO	YES	97.75	15.9342	73.0856	6717
batch4_C6e	Colo320DM	Nuclei_optimal	Single_Cell	MDA	4	NO	YES	97.65	11.0358	78.2636	5127
batch4_C7e	Colo320DM	Nuclei_optimal	Single_Cell	MDA	4	NO	YES	97.22	8.4377	78.5504	4302
batch4_C8e	Colo320DM	Nuclei_optimal	Single_Cell	MDA	4	NO	YES	97.52	8.2639	79.1595	4164
batch4_C9e	Colo320DM	Nuclei_optimal	Single_Cell	MDA	4	NO	YES	34.41	1.118	14.6779	1620
batch4_C10e	Colo320DM	Nuclei_optimal	Single_Cell	MDA	4	NO	YES	97.87	11.0877	78.6752	5726
batch4_C11e	Colo320DM	Nuclei_optimal	Single_Cell	MDA	4	NO	YES	97.16	10.5826	77.9095	5780
batch4_C12e	Colo320DM	Nuclei_optimal	Single_Cell	MDA	4	NO	YES	97.8	11.5645	78.6794	5241
batch4_C13e	Colo320DM	Nuclei_optimal	Single_Cell	MDA	4	NO	YES	96.11	10.0835	76.5487	5516
batch4_C14e	Colo320DM	Nuclei_optimal	Single_Cell	MDA	4	NO	YES	97.12	9.0863	79.6078	4353
batch4_C15e	Colo320DM	Nuclei_optimal	Single_Cell	MDA	4	NO	YES	97.99	9.8578	80.5548	5262
batch4_C16e	Colo320DM	Nuclei_optimal	Single_Cell	MDA	4	NO	YES	97.22	8.8092	79.8085	4715
batch4_C17e	Colo320DM	Nuclei_optimal	Single_Cell	MDA	4	NO	NO	22.85	0.1526	2.8643	877
batch4_C18e	Colo320DM	Nuclei_optimal	Single_Cell	MDA	4	NO	YES	98.2	14.2444	76.9696	5333
batch4_C19e	Colo320DM	Nuclei_optimal	Single_Cell	MDA	4	NO	YES	96.65	8.0652	80.2877	4284
batch4_C20e	Colo320DM	Nuclei_optimal	Single_Cell	MDA	4	NO	YES	96.03	12.1081	77.0295	4860
batch4_C21e	Colo320DM	Nuclei_optimal	Single_Cell	MDA	4	NO	YES	95.63	6.3828	77.9321	4424
batch4_C22e	Colo320DM	Nuclei_optimal	Single_Cell	MDA	4	NO	YES	93.48	5.2692	73	3606
batch4_C23e	Colo320DM	Nuclei_optimal	Single_Cell	MDA	4	NO	YES	81.82	0.816	54.7348	3922
batch4_C24e	Colo320DM	Nuclei_optimal	Single_Cell	MDA	4	NO	YES	98.68	16.839	76.5021	6695
batch4_C25e	Colo320DM	Nuclei_optimal	Single_Cell	MDA	4	NO	YES	98.28	9.1695	80.2867	5394
batch4_C26e	Colo320DM	Nuclei_optimal	Single_Cell	MDA	4	NO	YES	98.51	8.6278	80.6134	5032
batch4_C27e	Colo320DM	Nuclei_optimal	Single_Cell	MDA	4	NO	YES	98.65	17.0847	76.265	6670
batch4_C28e	Colo320DM	Nuclei_optimal	Single_Cell	MDA	4	NO	YES	88.62	3.6263	70.124	2537
batch4_C29e	Colo320DM	Nuclei_optimal	Single_Cell	MDA	4	NO	YES	98.01	14.31	78.0808	6044
batch4_C31e	Colo320DM	Nuclei_optimal	Single_Cell	MDA	4	NO	YES	98.29	10.2924	80.7643	4931
batch4_C32e	Colo320DM	Nuclei_optimal	Single_Cell	MDA	4	NO	YES	98.51	10.6565	81.3051	4874
batch4_C33e	Colo320DM	Nuclei_optimal	Single_Cell	MDA	4	NO	YES	97.1	7.9872	78.1038	4482
batch4_C34e	Colo320DM	Nuclei_optimal	Single_Cell	MDA	4	NO	YES	95.27	5.7292	75.2374	4159
batch4_C35e	Colo320DM	Nuclei_optimal	Single_Cell	MDA	4	NO	YES	97.43	10.7955	76.8692	5137
batch4_C36e	Colo320DM	Nuclei_optimal	Single_Cell	MDA	4	NO	YES	22.3	0.1375	6.5357	372
batch4_C37e	Colo320DM	Nuclei_optimal	Single_Cell	MDA	4	NO	YES	98.34	14.1428	74.9096	5492
batch4_C38e	Colo320DM	Nuclei_optimal	Single_Cell	MDA	4	NO	YES	79.59	2.4362	56.2221	2837
batch4_C39e	Colo320DM	Nuclei_optimal	Single_Cell	MDA	4	NO	YES	28.72	0.6791	10.4013	1274
batch4_C40e	Colo320DM	Nuclei_optimal	Single_Cell	MDA	4	NO	YES	98.57	15.2282	73.5696	6472
batch4_H1e	HeLa	Nuclei_optimal	Single_Cell	MDA	4	100mM_MTX_Day7	NO	98.35	13.7862	74.0002	5409
batch4_H2e	HeLa	Nuclei_optimal	Single_Cell	MDA	4	100mM_MTX_Day7	NO	98.33	14.268	73.8333	6165
batch4_H3e	HeLa	Nuclei_optimal	Single_Cell	MDA	4	100mM_MTX_Day7	NO	25.33	0.1127	7.182	0
batch4_H4e	HeLa	Nuclei_optimal	Single_Cell	MDA	4	100mM_MTX_Day7	NO	98.34	15.1186	73.4279	6136
batch4_H5e	HeLa	Nuclei_optimal	Single_Cell	MDA	4	100mM_MTX_Day7	NO	98.74	17.323	70.118	6734
batch4_H6e	HeLa	Nuclei_optimal	Single_Cell	MDA	4	100mM_MTX_Day7	NO	98.32	11.5917	74.7581	5554
batch4_H7e	HeLa	Nuclei_optimal	Single_Cell	MDA	4	100mM_MTX_Day7	NO	98.44	13.7711	74.4127	5683
batch4_H8e	HeLa	Nuclei_optimal	Single_Cell	MDA	4	100mM_MTX_Day7	NO	98.43	17.6725	69.4308	7157
batch4_H9e	HeLa	Nuclei_optimal	Single_Cell	MDA	4	100mM_MTX_Day7	NO	98.35	11.3876	72.0834	5980
batch4_H10e	HeLa	Nuclei_optimal	Single_Cell	MDA	4	100mM_MTX_Day7	NO	98.17	15.3924	69.6981	7021
batch4_H11e	HeLa	Nuclei_optimal	Single_Cell	MDA	4	100mM_MTX_Day7	NO	72.66	0.2903	47.5742	173
batch4_H12e	HeLa	Nuclei_optimal	Single_Cell	MDA	4	100mM_MTX_Day7	NO	98.2	12.3632	66.6875	6303
batch4_H13e	HeLa	Nuclei_optimal	Single_Cell	MDA	4	100mM_MTX_Day7	NO	19.48	0.0947	1.1685	441
batch4_H14e	HeLa	Nuclei_optimal	Single_Cell	MDA	4	100mM_MTX_Day7	NO	98.57	11.2941	74.8281	5169
batch4_H15e	HeLa	Nuclei_optimal	Single_Cell	MDA	4	100mM_MTX_Day7	NO	19.29	0.0879	0.8025	449
batch4_H16e	HeLa	Nuclei_optimal	Single_Cell	MDA	4	100mM_MTX_Day7	NO	97.3	14.7871	71.0298	5905
p1e	PC3	Nuclei_optimal	Single_Cell	Malbac	5	NO	NO	99.33	21.5132	32.0472	81246
p2e	PC3	Nuclei_optimal	Single_Cell	Malbac	5	NO	NO	99.16	16.7494	25.5545	51657
p3e	PC3	Nuclei_optimal	Single_Cell	Malbac	5	NO	NO	99.5	19.5277	29.9571	69017
p4e	PC3	Nuclei_optimal	Single_Cell	Malbac	5	NO	NO	99.47	18.8014	28.0839	62416
p5e	PC3	Nuclei_optimal	Single_Cell	Malbac	5	NO	NO	99.51	23.0448	32.9988	85274
p7e	PC3	Nuclei_optimal	Single_Cell	Malbac	5	NO	NO	99.68	26.117	31.4501	85157
K1e	K562	Nuclei_optimal	Single_Cell	MDA	6	NO	NO	36.95	0.0473	0.4317	1653
K2e	K562	Nuclei_optimal	Single_Cell	MDA	6	NO	NO	99.91	6.4832	80.8143	3671
K3e	K562	Nuclei_optimal	Single_Cell	MDA	6	NO	NO	29.75	0.0603	1.2194	83
K4e	K562	Nuclei_optimal	Single_Cell	MDA	6	NO	NO	32.58	0.0451	0.8514	1343
K5e	K562	Nuclei_optimal	Single_Cell	MDA	6	NO	NO	51.95	0.041	3.3811	368
K6e	K562	Nuclei_optimal	Single_Cell	MDA	6	NO	NO	99.52	6.2704	77.5171	3425
K7e	K562	Nuclei_optimal	Single_Cell	MDA	6	NO	NO	27.05	0.0695	0.9036	418
K8e	K562	Nuclei_optimal	Single_Cell	MDA	6	NO	NO	97.85	5.6457	78.4454	2843
K9e	K562	Nuclei_optimal	Single_Cell	MDA	6	NO	NO	99.79	12.4675	71.9795	5797
K10e	K562	Nuclei_optimal	Single_Cell	MDA	6	NO	NO	99.11	7.7561	78.4642	3935
K11e	K562	Nuclei_optimal	Single_Cell	MDA	6	NO	NO	98.68	5.868	80.7947	3041
K12e	K562	Nuclei_optimal	Single_Cell	MDA	6	NO	NO	31.34	0.0641	0.7109	1946
K13e	K562	Nuclei_optimal	Single_Cell	MDA	6	NO	NO	30.15	0.0626	0.4691	1405
K14e	K562	Nuclei_optimal	Single_Cell	MDA	6	NO	NO	44.32	0.064	5.1157	306
K15e	K562	Nuclei_optimal	Single_Cell	MDA	6	NO	NO	99.52	4.7652	81.7241	2583
K16e	K562	Nuclei_optimal	Single_Cell	MDA	6	NO	NO	87.08	0.4434	0	0
K17e	K562	Nuclei_optimal	Single_Cell	MDA	6	NO	NO	30.57	0.0653	0.544	1087
K18e	K562	Nuclei_optimal	Single_Cell	MDA	6	NO	NO	99.55	6.9568	78.6226	3684
K19e	K562	Nuclei_optimal	Single_Cell	MDA	6	NO	NO	99.61	6.9753	78.8728	3759
K20e	K562	Nuclei_optimal	Single_Cell	MDA	6	NO	NO	99.62	6.204	79.1883	3390
K21e	K562	Nuclei_optimal	Single_Cell	MDA	6	NO	NO	99.85	10.6816	72.9633	5476
K22e	K562	Nuclei_optimal	Single_Cell	MDA	6	NO	NO	97.03	13.6483	67.077	6930
K23e	K562	Nuclei_optimal	Single_Cell	MDA	6	NO	NO	97.03	4.7611	80.762	2756
K24e	K562	Nuclei_optimal	Single_Cell	MDA	6	NO	NO	83.49	0.6369	55.2255	2041
K25e	K562	Nuclei_optimal	Single_Cell	MDA	6	NO	NO	94.88	1.9779	80.6425	1309
K26e	K562	Nuclei_optimal	Single_Cell	MDA	6	NO	NO	96.69	7.0558	79.0501	3529
K27e	K562	Nuclei_optimal	Single_Cell	MDA	6	NO	NO	96.62	2.2798	83.7078	1341
K28e	K562	Nuclei_optimal	Single_Cell	MDA	6	NO	NO	97.23	7.4263	78.5557	3957
K29e	K562	Nuclei_optimal	Single_Cell	MDA	6	NO	NO	99.77	14.1007	67.4911	7482
K30e	K562	Nuclei_optimal	Single_Cell	MDA	6	NO	NO	99.08	3.8237	81.8261	2252
K31e	K562	Nuclei_optimal	Single_Cell	MDA	6	NO	NO	99.44	6.624	79.4048	3573
K32e	K562	Nuclei_optimal	Single_Cell	MDA	6	NO	NO	99.65	7.4826	78.013	3992
K33e	K562	Nuclei_optimal	Single_Cell	MDA	6	NO	NO	99.77	7.0167	79.0318	3926
K34e	K562	Nuclei_optimal	Single_Cell	MDA	6	NO	NO	58	0.0524	0	0
K35e	K562	Nuclei_optimal	Single_Cell	MDA	6	NO	NO	99.73	9.6699	75.1038	4572
K36e	K562	Nuclei_optimal	Single_Cell	MDA	6	NO	NO	99.77	5.5891	81.3212	2930
K37e	K562	Nuclei_optimal	Single_Cell	MDA	6	NO	NO	99.65	4.8876	83.18	2445
K38e	K562	Nuclei_optimal	Single_Cell	MDA	6	NO	NO	99.78	5.9676	80.4385	3141
K39e	K562	Nuclei_optimal	Single_Cell	MDA	6	NO	NO	99.71	5.7434	81.0223	3227
K40e	K562	Nuclei_optimal	Single_Cell	MDA	6	NO	NO	98.02	5.3558	79.2582	3187
colo_bulk_ecDNA	Colo320DM	Bulk	Circle-seq	Bulk	Sample	No_Amplification	6	NO	NO	95.59	92	17.75	3200
C1-1	Colo320DM	Nuclei_optimal	Single_Cell	MDA	6	NO	NO	72.4	0.0181	0.2349	385
C1-2	Colo320DM	Nuclei_optimal	Single_Cell	MDA	6	NO	NO	98.92	11.5196	68.4931	8363
C2-1	Colo320DM	Nuclei_optimal	Single_Cell	MDA	6	NO	NO	97.89	73.3797	73.3797	2833
C2-2	Colo320DM	Nuclei_optimal	Single_Cell	MDA	6	NO	NO	95.7	3.7551	69.877	3186
C3-1	Colo320DM	Nuclei_optimal	Single_Cell	MDA	6	NO	NO	98.69	1.1551	72.4786	1045
C3-2	Colo320DM	Nuclei_optimal	Single_Cell	MDA	6	NO	NO	95.37	71.4865	71.4865	3536
C4-1	Colo320DM	Nuclei_optimal	Single_Cell	MDA	6	NO	NO	98.92	75.586	75.586	3636
C4-2	Colo320DM	Nuclei_optimal	Single_Cell	MDA	6	NO	NO	98.41	72.6237	72.6237	3943
D17-H1	HeLa	Nuclei_optimal	Single_Cell	MDA	7	100mM_MTX_Day17	NO	99.93	5.416	79.4111	4259
D17-H2	HeLa	Nuclei_optimal	Single_Cell	MDA	7	100mM_MTX_Day17	NO	99.88	9.4404	71.2323	5479
D17-H3	HeLa	Nuclei_optimal	Single_Cell	MDA	7	100mM_MTX_Day17	NO	99.88	8.046	75.5949	4991
D17-H4	HeLa	Nuclei_optimal	Single_Cell	MDA	7	100mM_MTX_Day17	NO	99.87	7.8781	75.7677	5453
D17-H5	HeLa	Nuclei_optimal	Single_Cell	MDA	7	100mM_MTX_Day17	NO	99.68	9.7582	70.3892	6175
D17-H6	HeLa	Nuclei_optimal	Single_Cell	MDA	7	100mM_MTX_Day17	NO	99.88	8.6751	74.5934	5316
D17-H7	HeLa	Nuclei_optimal	Single_Cell	MDA	7	100mM_MTX_Day17	NO	99.69	6.631	77.099	4889
D17-H8	HeLa	Nuclei_optimal	Single_Cell	MDA	7	100mM_MTX_Day17	NO	99.9	7.3139	76.4108	5268
D17-H9	HeLa	Nuclei_optimal	Single_Cell	MDA	7	100mM_MTX_Day17	NO	99.87	12.4119	75.6044	6892
D17-H10	HeLa	Nuclei_optimal	Single_Cell	MDA	7	100mM_MTX_Day17	NO	99.8	11.2291	76.9167	6387
D17-H11	HeLa	Nuclei_optimal	Single_Cell	MDA	7	100mM_MTX_Day17	NO	99.79	12.9899	75.9916	6942
D17-H12	HeLa	Nuclei_optimal	Single_Cell	MDA	7	100mM_MTX_Day17	NO	99.78	12.8607	76.3856	6294
D17-H13	HeLa	Nuclei_optimal	Single_Cell	MDA	7	100mM_MTX_Day17	NO	99.85	10.5592	77.9506	5779
D17-H14	HeLa	Nuclei_optimal	Single_Cell	MDA	7	100mM_MTX_Day17	NO	99.85	12.7225	76.0931	6649
D17-H15	HeLa	Nuclei_optimal	Single_Cell	MDA	7	100mM_MTX_Day17	NO	99.74	13.7712	76.096	7193
D17-H16	HeLa	Nuclei_optimal	Single_Cell	MDA	7	100mM_MTX_Day17	NO	99.87	12.4644	76.6561	6468
D17-H17	HeLa	Nuclei_optimal	Single_Cell	MDA	7	100mM_MTX_Day17	NO	99.76	7.8653	73.4432	5491
D17-H18	HeLa	Nuclei_optimal	Single_Cell	MDA	7	100mM_MTX_Day17	NO	99.79	7.818	73.5322	5342
D17-H19	HeLa	Nuclei_optimal	Single_Cell	MDA	7	100mM_MTX_Day17	NO	99.88	7.0558	77.4498	5019
D17-H20	HeLa	Nuclei_optimal	Single_Cell	MDA	7	100mM_MTX_Day17	NO	99.86	7.8309	74.6289	5317
D17-H21	HeLa	Nuclei_optimal	Single_Cell	MDA	7	100mM_MTX_Day17	NO	99.79	8.331	73.3439	5803
D17-H22	HeLa	Nuclei_optimal	Single_Cell	MDA	7	100mM_MTX_Day17	NO	99.8	9.4424	71.9521	6126
D17-H23	HeLa	Nuclei_optimal	Single_Cell	MDA	7	100mM_MTX_Day17	NO	99.9	9.3315	72.8262	5694
D17-H24	HeLa	Nuclei_optimal	Single_Cell	MDA	7	100mM_MTX_Day17	NO	99.87	6.4416	75.8629	4496
D17-H25	HeLa	Nuclei_optimal	Single_Cell	MDA	7	100mM_MTX_Day17	NO	99.91	8.2878	75.1656	5673
D17-H26	HeLa	Nuclei_optimal	Single_Cell	MDA	7	100mM_MTX_Day17	NO	99.86	8.28	70.6525	6030
D7-H17	HeLa	Nuclei_optimal	Single_Cell	MDA	7	100mM_MTX_Day7	NO	99.75	14.1357	69.3908	6073
D7-H18	HeLa	Nuclei_optimal	Single_Cell	MDA	7	100mM_MTX_Day7	NO	99.39	15.0307	64.7406	6370
D7-H19	HeLa	Nuclei_optimal	Single_Cell	MDA	7	100mM_MTX_Day7	NO	99.51	14.5444	68.9116	6898
D7-H20	HeLa	Nuclei_optimal	Single_Cell	MDA	7	100mM_MTX_Day7	NO	99.63	12.2232	67.9373	6346
D7-H21	HeLa	Nuclei_optimal	Single_Cell	MDA	7	100mM_MTX_Day7	NO	99.56	14.8904	67.9391	6472
D7-H22	HeLa	Nuclei_optimal	Single_Cell	MDA	7	100mM_MTX_Day7	NO	99.84	13.9082	68.9913	6468
D7-H23	HeLa	Nuclei_optimal	Single_Cell	MDA	7	100mM_MTX_Day7	NO	99.41	13.9326	70.342	6755
D7-H24	HeLa	Nuclei_optimal	Single_Cell	MDA	7	100mM_MTX_Day7	NO	43.38	0.1026	11.2625	333
D7-H25	HeLa	Nuclei_optimal	Single_Cell	MDA	7	100mM_MTX_Day7	NO	99.59	13.1585	69.3011	5898
D7-H26	HeLa	Nuclei_optimal	Single_Cell	MDA	7	100mM_MTX_Day7	NO	99.9	14.9912	69.7326	6785
D7-H27	HeLa	Nuclei_optimal	Single_Cell	MDA	7	100mM_MTX_Day7	NO	99.8	13.5226	68.4064	6612
D7-H28	HeLa	Nuclei_optimal	Single_Cell	MDA	7	100mM_MTX_Day7	NO	99.89	15.0814	67.1159	6481
D7-H29	HeLa	Nuclei_optimal	Single_Cell	MDA	7	100mM_MTX_Day7	NO	99.52	12.5658	69.5906	5730
D7-H30	HeLa	Nuclei_optimal	Single_Cell	MDA	7	100mM_MTX_Day7	NO	99.84	14.711	65.1377	7337
D7-H31	HeLa	Nuclei_optimal	Single_Cell	MDA	7	100mM_MTX_Day7	NO	99.38	13.9826	64.115	6560
D7-H32	HeLa	Nuclei_optimal	Single_Cell	MDA	7	100mM_MTX_Day7	NO	99.83	15.1191	65.914	7493
D7-H33	HeLa	Nuclei_optimal	Single_Cell	MDA	7	100mM_MTX_Day7	NO	99.84	14.8188	69.4193	6533
D7-H34	HeLa	Nuclei_optimal	Single_Cell	MDA	7	100mM_MTX_Day7	NO	99.81	13.569	66.6151	6594
D7-H35	HeLa	Nuclei_optimal	Single_Cell	MDA	7	100mM_MTX_Day7	NO	99.74	12.613	65.8128	6925
D7-H36	HeLa	Nuclei_optimal	Single_Cell	MDA	7	100mM_MTX_Day7	NO	99.63	11.1411	68.0337	6112
D7-H37	HeLa	Nuclei_optimal	Single_Cell	MDA	7	100mM_MTX_Day7	NO	99.7	14.4315	61.643	6846
D7-H38	HeLa	Nuclei_optimal	Single_Cell	MDA	7	100mM_MTX_Day7	NO	99.86	11.738	67.3851	7093
D7-H39	HeLa	Nuclei_optimal	Single_Cell	MDA	7	100mM_MTX_Day7	NO	99.86	12.4199	69.1084	6884
D7-H40	HeLa	Nuclei_optimal	Single_Cell	MDA	7	100mM_MTX_Day7	NO	99.39	13.7679	69.6436	6103
D7-H41	HeLa	Nuclei_optimal	Single_Cell	MDA	7	100mM_MTX_Day7	NO	99.56	15.3505	63.0844	7499
D7-H42	HeLa	Nuclei_optimal	Single_Cell	MDA	7	100mM_MTX_Day7	NO	64.87	0.2603	37.5099	182
D7-H43	HeLa	Nuclei_optimal	Single_Cell	MDA	7	100mM_MTX_Day7	NO	86.49	0.3599	63.5145	245
D7-H44	HeLa	Nuclei_optimal	Single_Cell	MDA	7	100mM_MTX_Day7	NO	99.71	13.8923	62.7806	6771
D7-H45	HeLa	Nuclei_optimal	Single_Cell	MDA	7	100mM_MTX_Day7	NO	99.75	14.4401	65.6126	7872
D7-H46	HeLa	Nuclei_optimal	Single_Cell	MDA	7	100mM_MTX_Day7	NO	99.28	11.0191	70.1657	5432
D7-H47	HeLa	Nuclei_optimal	Single_Cell	MDA	7	100mM_MTX_Day7	NO	99.8	13.4573	64.189	6463
D7-H48	HeLa	Nuclei_optimal	Single_Cell	MDA	7	100mM_MTX_Day7	NO	59.87	0.2768	34.8752	277
batch11_T1e	293T	Nuclei_optimal	Single_Cell	MDA	8	NO	NO	99.17	5.5522	51.7994	5652
batch11_T2e	293T	Nuclei_optimal	Single_Cell	MDA	8	NO	NO	99.54	16.2574	64.1392	6800
batch11_T3e	293T	Nuclei_optimal	Single_Cell	MDA	8	NO	NO	99.48	13.7321	60.135	7995
batch11_T4e	293T	Nuclei_optimal	Single_Cell	MDA	8	NO	NO	98.42	2.5638	42.3207	5270
batch11_T5e	293T	Nuclei_optimal	Single_Cell	MDA	8	NO	NO	98.68	11.9963	71.833	5280
batch11_T6e	293T	Nuclei_optimal	Single_Cell	MDA	8	NO	NO	98.27	8.9331	69.7909	4862
batch11_T7e	293T	Nuclei_optimal	Single_Cell	MDA	8	NO	NO	99.09	15.1933	72.4234	5210
batch11_T8e	293T	Nuclei_optimal	Single_Cell	MDA	8	NO	NO	98.74	13.7671	74.5559	4337
batch11_T9e	293T	Nuclei_optimal	Single_Cell	MDA	8	NO	NO	98.37	10.8583	73.9677	3901
batch11_T10e	293T	Nuclei_optimal	Single_Cell	MDA	8	NO	NO	99.24	10.895	74.0912	4285
batch11_T11e	293T	Nuclei_optimal	Single_Cell	MDA	8	NO	NO	98.96	14.246	70.0466	5662
batch11_T12e	293T	Nuclei_optimal	Single_Cell	MDA	8	NO	NO	99.38	22.8885	59.4486	7985
batch11_T13e	293T	Nuclei_optimal	Single_Cell	MDA	8	NO	NO	98.51	10.2821	73.2472	4673
batch11_T14e	293T	Nuclei_optimal	Single_Cell	MDA	8	NO	NO	98.49	8.8824	76.2141	3949
batch11_T15e	293T	Nuclei_optimal	Single_Cell	MDA	8	NO	NO	95.7	8.9906	75.9537	3159
batch11_T16e	293T	Nuclei_optimal	Single_Cell	MDA	8	NO	NO	98.57	10.6774	74.8384	4281
batch11_T17e	293T	Nuclei_optimal	Single_Cell	MDA	8	NO	NO	99.01	13.9569	70.5321	5591
batch11_T18e	293T	Nuclei_optimal	Single_Cell	MDA	8	NO	NO	99.05	13.5578	71.7826	5445
batch11_T19e	293T	Nuclei_optimal	Single_Cell	MDA	8	NO	NO	98.82	12.5832	68.8927	5554
batch11_T20e	293T	Nuclei_optimal	Single_Cell	MDA	8	NO	NO	98.98	13.0011	72.7496	5069
batch11_T21e	293T	Nuclei_optimal	Single_Cell	MDA	8	NO	NO	98.94	12.8375	71.4648	5096
batch11_T22e	293T	Nuclei_optimal	Single_Cell	MDA	8	NO	NO	97.88	10.8668	73.7012	4151
batch11_T23e	293T	Nuclei_optimal	Single_Cell	MDA	8	NO	NO	98.08	12.1194	72.408	4733
batch11_T24e	293T	Nuclei_optimal	Single_Cell	MDA	8	NO	NO	99.29	13.41	73.6769	4663
